# Supplementary material for: Ophiopogonin D' induces RIPK1-dependent necroptosis in androgen-dependent LNCaP prostate cancer cells
Source: PubMed Central journal article supplement — Int J Oncol. 2019 Dec 17;56(2):439–47. doi: 10.3892/ijo.2019.4945 (PMC6959467; doi:10.3892/ijo.2019.4945), 2019-12-17

Figure S1. The viability of LNCaP cells examined by Cell Counting Kit-8 assay following treatment with different concentrations of OPD, OPD' or Sor (positive control) for 24 h (n=3). OPD, Ophiopogonin D; OPD', Ophiopogonin D'; Sor, sorafenib.

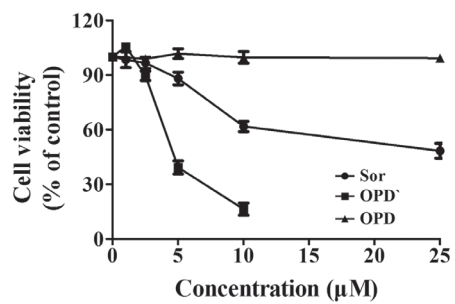

Figure S2. Western blotting demonstrating the protein expression of p-MLKL (220 kDa and 55 kDa) and MLKL (220 kDa and 55 kDa) in LNCaP cells following treatment with OPD' for 6 h. MLKL, mixed lineage kinase domain-like protein; OPD', Ophiopogonin D'.

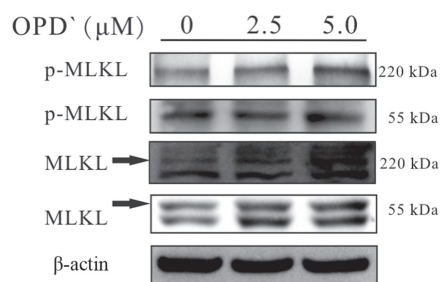

Supplement: Supplementary_Data.pdf [file Supplementary_Data.pdf]
